# Supplementary material for: Regional industrial growth and biopharma patent networks: empirical insights from the UK
Source: Appl Netw Sci. 2022 Nov 16;7(1):77. doi: 10.1007/s41109-022-00518-3 (PMC9667447; doi:10.1007/s41109-022-00518-3)
Supplement: Supplementary file 1 — Additional file 1. Appendix 1.csv. [file 41109_2022_518_MOESM1_ESM.csv]

PACode	area	region
AB	Aberdeen	Scotland
B	Birmingham	West Midlands
BA	Bath	South West
BS	Bristol	South West
BT	Belfast	Northern Ireland
CB	Cambridge	East of England
CF	Cardiff	Wales
CH	Chester	North West
CT	Canterbury	South East
CV	Coventry	West Midlands
CW	Crewe	North West
DD	Dundee	Scotland
DH	Durham	North East
DN	Doncaster	East Midlands
E	London	Greater London
EC	London	Greater London
EH	Edinburgh	Scotland
EX	Exeter	South West
G	Glasgow	Scotland
GU	Guilford	South East
HP	Hemel	East of England
HU	Hull	North East
IP	Ipswich	East of England
KT	Kingston	Greater London
KY	Kirkaldy	Scotland
L	Liverpool	North West
LE	Leicester	East Midlands
LL	Llandudno	Wales
LS	Leeds	North East
M	Manchester	North West
MK	Milton Keynes	South East
ML	Motherwell	Scotland
N	London	Greater London
NE	Newcastle	North East
NG	Nottingham	East Midlands
NW	London	Greater London
OX	Oxford	South East
PO	Portsmouth	South East
RG	Reading	South East
RH	Redhill	South East
S	Sheffield	East Midlands
SA	Swansea	Wales
SG	Stevenage	East of England
SL	Slough	South East
SN	Swindon	South West
SO	Southampton	South East
SW	London	Greater London
TN	Tonbridge	South East
TQ	Torquay	South West
TW	Twickenham	Greater London
UB	Southall	Greater London
W	London	Greater London
WC	London	Greater London
YO	York	North East
AL	St. Albans	East of England
BB	Blackburn	North West
BD	Bradford	North West
BH	Bournemouth	South West
BL	Bolton	North West
BN	Brighton	South East
BR	Bromley	Greater London
CA	Carlisle	North West
CM	Chelmsford	East of England
CO	Colchester	East of England
CR	Croydon	Greater London
DA	Dartford	Greater London
DE	Derby	East Midlands
DG	Dumfries	Scotland
DL	Darlington	North East
DT	Dorchester	South West
DY	Dudley	West Midlands
EN	Enfield	Greater London
FK	Falkirk	Scotland
FY	Blackpool	North West
GL	Gloucester	South West
GY	Guernsey	Channel Islands
HA	Harrow	Greater London
HD	Huddersfield	North West
HG	Harrogate	North East
HR	Hereford	West Midlands
HS	Comhairle nan Eilean Siar	Scotland
HX	Halifax	North West
IG	Ilford	Greater London
IM	Isle of Man	Isle of Man
IV	Inverness	Scotland
JE	Jersey	Channel Islands
KA	Kilmarnock	Scotland
KW	Kirkwall	Scotland
LA	Lancaster	North West
LD	Llandrindod	Wales
LN	Lincoln	East Midlands
LU	Luton	East of England
ME	Medway	South East
NN	Northampton	West Midlands
NP	Newport	Wales
NR	Norwich	East of England
OL	Oldham	North West
PA	Paisley	Scotland
PE	Peterborough	East England
PH	Perth	Scotland
PL	Plymouth	South West
PR	Preston	North West
QC	Awarding Bodies	Non-geographic
RM	Romford	Greater London
SE	London	Greater London
SK	Stockport	North West
SM	Sutton	Greater London
SP	Salisbury	South West
SR	Sunderland	North East
SS	Southend	East of England
ST	Stoke on Trent	West Midlands
SY	Shrewsbury	Wales
TA	Taunton	South West
TD	Galashiels	Scotland
TF	Telford	West Midlands
TR	Truro	South West
TS	Cleveland	North East
WA	Warrington	North West
WD	Watford	Greater London
WF	Wakefield	North East
WN	Wigan	North West
WR	Worcester	West Midlands
WS	Walsall	West Midlands
WV	Wolverhampton	West Midlands
ZE	Shetland	Scotland
